# Supplementary material for: A case series of dermatomyositis following SARS-CoV-2 vaccination
Source: PubMed Central journal article supplement (PMC9676274; doi:10.3389/fmed.2022.1013378), 2022-11-07
Supplement: Data_Sheet_1.pdf [file Data_Sheet_1.pdf]

## **Supplementary Material**

### **S1. Predetermined Questionnaire for Patient Phone Interviews**

1. Did you receive the COVID Vaccine?
2. What vaccine did you receive and how many doses of each?
3. Did you have a reaction to the vaccine?
4. Did it cause a flare up of your dermatomyositis?
5. Did you have flu-like symptoms up to 1 week after your vaccine?
